# Supplementary material
Source: Springer Nature journal article supplement (https://www.springermedizin.de/resource/supplementary/12936_2010_1647_MOESM4_ESM.pdf/9542252)

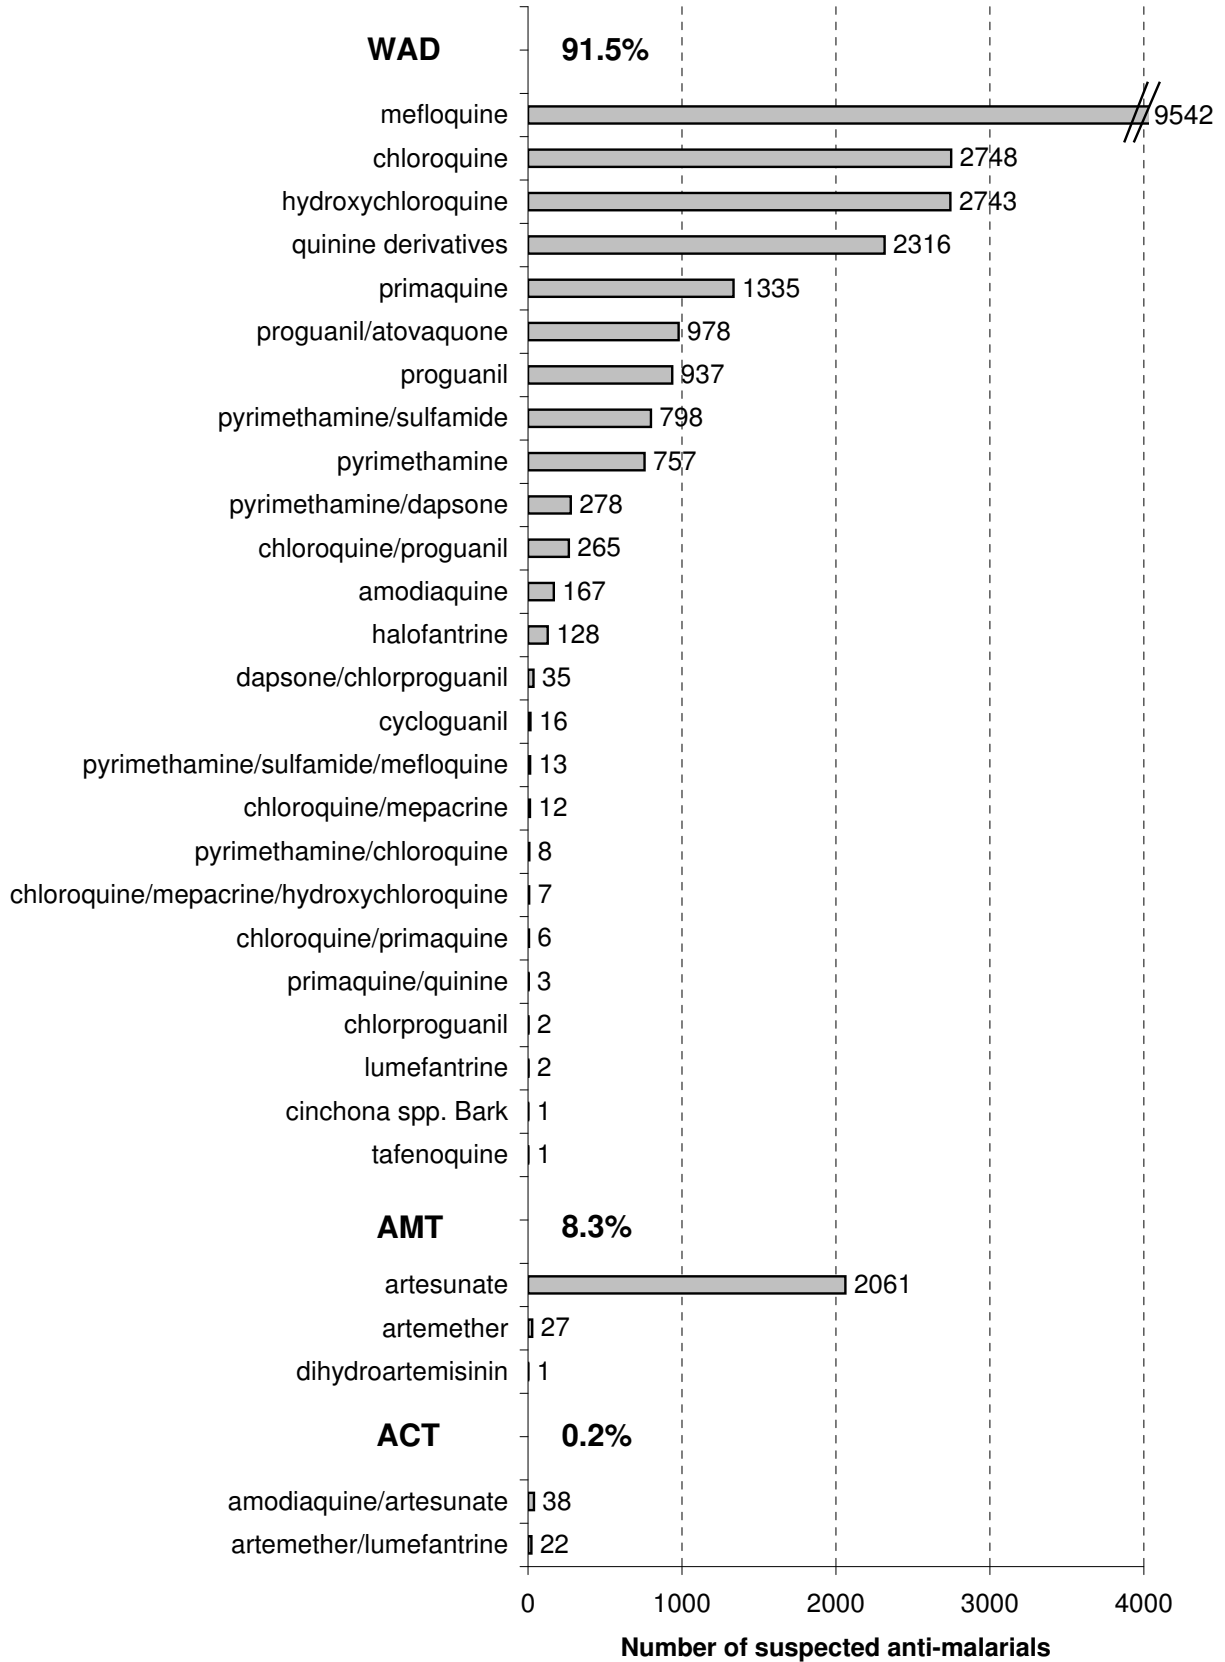

Supplement: MOESM4 [file 9542252]
